# Supplementary material for: Caregiver support and burden drive intention to engage in a peer-to-peer exchange of services among caregivers of dementia patients
Source: PubMed Central journal article supplement (PMC10359163; doi:10.3389/fpsyt.2023.1208594), 2023-07-06
Supplement: Data_Sheet_1.pdf [file Data_Sheet_1.pdf]

## *Supplementary Material*

### **Caregiver support and burden drive intention to engage in a peer-to-peer exchange of services among caregivers of dementia patients**

**O. Zeynep Aksin<sup>\*</sup>, Basar Bilgic, Perihan Guner, Evrim D. Gunes, Kemal Kuscü, E. Lerzan Ormeci, Serpil Sayin, Hale Yapici Eser**

**\* Correspondence:**

O. Zeynep Aksin  
zaksin@ku.edu.tr

#### **1 Care Environment and Support Assessment Questionnaire**

1. The patient;

- Name - Surname: (1) \_\_\_\_\_
- TR Identity Number: (2) \_\_\_\_\_

2. How old are you? Please write: \_\_\_\_\_

3. Your Gender:

- Female (1)
- Male (2)

4. Your education:

- Illiterate (1)
- Literate (2)
- Elementary school (3)
- Middle school (4)
- High school (5)
- University (6)
- Masters degree (7)
- PhD (8)

5. Your marital status:

- single (1)
- married (2)
- Widowed / Divorced (3)

6. Please tick the most appropriate one of the following statements about your employment status.

- I work full time. (1)
- I work part time. (2)
- I am a housewife. (3)
- I am a student. (4)
- I am retired. (5)
- I had to quit my job to take care of my patient. (6)
- Other (please explain) (7) \_\_\_\_\_

7. How do you evaluate your income?

- Very Low (1)
- Low (2)
- Medium (3)
- High (4)
- Very High (5)

8. Do you have a smartphone?

- Yes (1)
- No (2)

8b. Does anyone have a smartphone at home?

- Yes (1)
- No (2)

9. How is your internet access?

- None (1)
- Restricted (2)
- Sufficient (3)
- Comfortable (4)
- Continuous and Unlimited (5)

9b. (If Your Answer Is No) Does anyone have internet access at home?

- None (1)
- Restricted (2)
- Sufficient (3)
- Comfortable (4)
- Continuous and Unlimited (5)

10. Do you use the applications below?

|                                                                 | Never                 | Rarely                | Sometimes             | Often                 | Always                |
|-----------------------------------------------------------------|-----------------------|-----------------------|-----------------------|-----------------------|-----------------------|
|                                                                 | (1)                   | (2)                   | (3)                   | (4)                   | (5)                   |
| Whatsapp (1)                                                    | <input type="radio"/> | <input type="radio"/> | <input type="radio"/> | <input type="radio"/> | <input type="radio"/> |
| Facebook (2)                                                    | <input type="radio"/> | <input type="radio"/> | <input type="radio"/> | <input type="radio"/> | <input type="radio"/> |
| Online Shopping<br>(Hepsiburada, n11.com, etc.) (3)             | <input type="radio"/> | <input type="radio"/> | <input type="radio"/> | <input type="radio"/> | <input type="radio"/> |
| Online Services<br>(banking, BiTaksi, e-reservations, etc.) (4) | <input type="radio"/> | <input type="radio"/> | <input type="radio"/> | <input type="radio"/> | <input type="radio"/> |

11. Your relationship to the patient:

- I'm the spouse (1)
- I'm a child (2)
- I'm a son/daughter in-law (3)
- I'm a sibling (4)
- I'm a relative (5)

- I am a paid assistant (6)
- Other (Please explain): (7) \_\_\_\_\_

12. How many adults are in your household besides the patient and you?

- Nobody (1)
- 1 (2)
- 2 (3)
- 3 (4)
- 4 or more (5)

13. How are the other adults in the household related to you? (You can mark more than one)

- Spouse (1)
- Child (2)
- Mom or Dad (3)
- Paid helper (4)
- Other (Please explain) : (5) \_\_\_\_\_

14. For how long have you been caring for your patient?

- less than 1 year (1)
- 1-2 years (2)
- 3-5 years (3)
- 6-10 years (4)
- 11 years and above (5)

15. How many hours a day do you provide care?

- 0-1 hour (1)
- 2-3 hours (2)
- 4-5 hours (3)
- 6-8 hours (4)
- 9-24 hours (5)

16. Do your household support you with household chores?

- Never (1)
- Rarely (2)
- Sometimes (3)
- Often (4)

- Always (5)

17. Can you leave home, entrusting your patient with the parties below?

|                                    | Never                 | Rarely                | Sometimes             | Often                 | Always                |
|------------------------------------|-----------------------|-----------------------|-----------------------|-----------------------|-----------------------|
|                                    | (1)                   | (2)                   | (3)                   | (4)                   | (5)                   |
| Family members (1)                 | <input type="radio"/> | <input type="radio"/> | <input type="radio"/> | <input type="radio"/> | <input type="radio"/> |
| Neighbors / Friends (2)            | <input type="radio"/> | <input type="radio"/> | <input type="radio"/> | <input type="radio"/> | <input type="radio"/> |
| Relatives (3)                      | <input type="radio"/> | <input type="radio"/> | <input type="radio"/> | <input type="radio"/> | <input type="radio"/> |
| Alzheimer Association Volunteer(4) | <input type="radio"/> | <input type="radio"/> | <input type="radio"/> | <input type="radio"/> | <input type="radio"/> |
| Municipal Volunteer (5)            | <input type="radio"/> | <input type="radio"/> | <input type="radio"/> | <input type="radio"/> | <input type="radio"/> |
| Private Care Company (6)           | <input type="radio"/> | <input type="radio"/> | <input type="radio"/> | <input type="radio"/> | <input type="radio"/> |
| Paid Help (7)                      | <input type="radio"/> | <input type="radio"/> | <input type="radio"/> | <input type="radio"/> | <input type="radio"/> |
| Other (explain) (8)                | <input type="radio"/> | <input type="radio"/> | <input type="radio"/> | <input type="radio"/> | <input type="radio"/> |

18. Can you get support for caregiving tasks from the parties below while at home?

|  | Never                 | Rarely                | Sometimes             | Often                 | Always                |
|--|-----------------------|-----------------------|-----------------------|-----------------------|-----------------------|
|  | (1)                   | (2)                   | (3)                   | (4)                   | (5)                   |
|  | <input type="radio"/> | <input type="radio"/> | <input type="radio"/> | <input type="radio"/> | <input type="radio"/> |

|                                       |                       |                       |                       |                       |                       |
|---------------------------------------|-----------------------|-----------------------|-----------------------|-----------------------|-----------------------|
| Family members (1)                    | <input type="radio"/> | <input type="radio"/> | <input type="radio"/> | <input type="radio"/> | <input type="radio"/> |
| Neighbors / Friends (2)               | <input type="radio"/> | <input type="radio"/> | <input type="radio"/> | <input type="radio"/> | <input type="radio"/> |
| Relatives (3)                         | <input type="radio"/> | <input type="radio"/> | <input type="radio"/> | <input type="radio"/> | <input type="radio"/> |
| Alzheimer Association<br>Volunteer(4) | <input type="radio"/> | <input type="radio"/> | <input type="radio"/> | <input type="radio"/> | <input type="radio"/> |
| Municipal Volunteer (5)               | <input type="radio"/> | <input type="radio"/> | <input type="radio"/> | <input type="radio"/> | <input type="radio"/> |
| Private Care Company<br>(6)           | <input type="radio"/> | <input type="radio"/> | <input type="radio"/> | <input type="radio"/> | <input type="radio"/> |
| Paid Help (7)                         | <input type="radio"/> | <input type="radio"/> | <input type="radio"/> | <input type="radio"/> | <input type="radio"/> |
| Other (explain) (8)                   | <input type="radio"/> | <input type="radio"/> | <input type="radio"/> | <input type="radio"/> | <input type="radio"/> |

19. Can you receive information or advise on caregiving knowhow from the parties below?

|  | Never | Rarely | Sometimes | Often | Always |
|--|-------|--------|-----------|-------|--------|
|  | (1)   | (2)    | (3)       | (4)   | (5)    |

|                                       |                       |                       |                       |                       |                       |
|---------------------------------------|-----------------------|-----------------------|-----------------------|-----------------------|-----------------------|
| Family members (1)                    | <input type="radio"/> | <input type="radio"/> | <input type="radio"/> | <input type="radio"/> | <input type="radio"/> |
| Neighbors / Friends (2)               | <input type="radio"/> | <input type="radio"/> | <input type="radio"/> | <input type="radio"/> | <input type="radio"/> |
| Relatives (3)                         | <input type="radio"/> | <input type="radio"/> | <input type="radio"/> | <input type="radio"/> | <input type="radio"/> |
| Alzheimer Association<br>Volunteer(4) | <input type="radio"/> | <input type="radio"/> | <input type="radio"/> | <input type="radio"/> | <input type="radio"/> |
| Municipal Volunteer (5)               | <input type="radio"/> | <input type="radio"/> | <input type="radio"/> | <input type="radio"/> | <input type="radio"/> |
| Private Care Company<br>(6)           | <input type="radio"/> | <input type="radio"/> | <input type="radio"/> | <input type="radio"/> | <input type="radio"/> |
| Paid Help (7)                         | <input type="radio"/> | <input type="radio"/> | <input type="radio"/> | <input type="radio"/> | <input type="radio"/> |
| Other (explain) (8)                   | <input type="radio"/> | <input type="radio"/> | <input type="radio"/> | <input type="radio"/> | <input type="radio"/> |

20. Can you share experiences and problems related to caregiving with the parties below?

|  | Never | Rarely | Sometimes | Often | Always |
|--|-------|--------|-----------|-------|--------|
|  | (1)   | (2)    | (3)       | (4)   | (5)    |

|                                    |                       |                       |                       |                       |                       |
|------------------------------------|-----------------------|-----------------------|-----------------------|-----------------------|-----------------------|
| Family members (1)                 | <input type="radio"/> | <input type="radio"/> | <input type="radio"/> | <input type="radio"/> | <input type="radio"/> |
| Neighbors / Friends (2)            | <input type="radio"/> | <input type="radio"/> | <input type="radio"/> | <input type="radio"/> | <input type="radio"/> |
| Relatives (3)                      | <input type="radio"/> | <input type="radio"/> | <input type="radio"/> | <input type="radio"/> | <input type="radio"/> |
| Alzheimer Association Volunteer(4) | <input type="radio"/> | <input type="radio"/> | <input type="radio"/> | <input type="radio"/> | <input type="radio"/> |
| Paid Help (5)                      | <input type="radio"/> | <input type="radio"/> | <input type="radio"/> | <input type="radio"/> | <input type="radio"/> |
| Other (explain) (6)                | <input type="radio"/> | <input type="radio"/> | <input type="radio"/> | <input type="radio"/> | <input type="radio"/> |

21. If you had the means, would you like to place your patient in a nursing home?

- I certainly would not (1)
- I would not (2)
- I'm undecided (3)
- I would (4)
- I definitely would (5)

22. What kind of support would you like to receive from a social worker/ volunteer?

|  | Never | Rarely | Sometimes | Often | Always |
|--|-------|--------|-----------|-------|--------|
|  | (1)   | (2)    | (3)       | (4)   | (5)    |



|                                                                |                       |                       |                       |                       |                       |
|----------------------------------------------------------------|-----------------------|-----------------------|-----------------------|-----------------------|-----------------------|
| Entrust the patient to run errands(1)                          | <input type="radio"/> | <input type="radio"/> | <input type="radio"/> | <input type="radio"/> | <input type="radio"/> |
| Support in patient care                                        | <input type="radio"/> | <input type="radio"/> | <input type="radio"/> | <input type="radio"/> | <input type="radio"/> |
| Support in household chores (3)                                | <input type="radio"/> | <input type="radio"/> | <input type="radio"/> | <input type="radio"/> | <input type="radio"/> |
| Information/advise on dementia and patient care (4)            | <input type="radio"/> | <input type="radio"/> | <input type="radio"/> | <input type="radio"/> | <input type="radio"/> |
| Information/advise on legal matters related to the patient (5) | <input type="radio"/> | <input type="radio"/> | <input type="radio"/> | <input type="radio"/> | <input type="radio"/> |
| Exchange experiences, chat (6)                                 | <input type="radio"/> | <input type="radio"/> | <input type="radio"/> | <input type="radio"/> | <input type="radio"/> |

23. What kind of support would you like to receive from someone with a dementia patient in their family?

|  | Never | Rarely | Sometimes | Often | Always |
|--|-------|--------|-----------|-------|--------|
|  | (1)   | (2)    | (3)       | (4)   | (5)    |
|  |       |        |           |       |        |

|                                                     |                       |                       |                       |                       |                       |
|-----------------------------------------------------|-----------------------|-----------------------|-----------------------|-----------------------|-----------------------|
| Entrust the patient to run errands(1)               | <input type="radio"/> | <input type="radio"/> | <input type="radio"/> | <input type="radio"/> | <input type="radio"/> |
| Support in patient care                             | <input type="radio"/> | <input type="radio"/> | <input type="radio"/> | <input type="radio"/> | <input type="radio"/> |
| Support in household chores (3)                     | <input type="radio"/> | <input type="radio"/> | <input type="radio"/> | <input type="radio"/> | <input type="radio"/> |
| Information/advise on dementia and patient care (4) | <input type="radio"/> | <input type="radio"/> | <input type="radio"/> | <input type="radio"/> | <input type="radio"/> |
| Exchange experiences, chat (5)                      | <input type="radio"/> | <input type="radio"/> | <input type="radio"/> | <input type="radio"/> | <input type="radio"/> |

24. What kind of support would you like to receive from a healthcare professional?

|                                                     | Never                 | Rarely                | Sometimes             | Often                 | Always                |
|-----------------------------------------------------|-----------------------|-----------------------|-----------------------|-----------------------|-----------------------|
|                                                     | (1)                   | (2)                   | (3)                   | (4)                   | (5)                   |
| Entrust the patient to run errands(1)               | <input type="radio"/> | <input type="radio"/> | <input type="radio"/> | <input type="radio"/> | <input type="radio"/> |
| Support in patient care                             | <input type="radio"/> | <input type="radio"/> | <input type="radio"/> | <input type="radio"/> | <input type="radio"/> |
| Information/advise on dementia and patient care (3) | <input type="radio"/> | <input type="radio"/> | <input type="radio"/> | <input type="radio"/> | <input type="radio"/> |

25. What kind of support can you provide to someone with a dementia patient in their family?

|                                                     | Never                 | Rarely                | Sometimes             | Often                 | Always                |
|-----------------------------------------------------|-----------------------|-----------------------|-----------------------|-----------------------|-----------------------|
|                                                     | (1)                   | (2)                   | (3)                   | (4)                   | (5)                   |
| Entrust the patient to run errands(1)               | <input type="radio"/> | <input type="radio"/> | <input type="radio"/> | <input type="radio"/> | <input type="radio"/> |
| Support in patient care                             | <input type="radio"/> | <input type="radio"/> | <input type="radio"/> | <input type="radio"/> | <input type="radio"/> |
| Support in household chores (3)                     | <input type="radio"/> | <input type="radio"/> | <input type="radio"/> | <input type="radio"/> | <input type="radio"/> |
| Information/advise on dementia and patient care (4) | <input type="radio"/> | <input type="radio"/> | <input type="radio"/> | <input type="radio"/> | <input type="radio"/> |
| Exchange experiences, chat (5)                      | <input type="radio"/> | <input type="radio"/> | <input type="radio"/> | <input type="radio"/> | <input type="radio"/> |

26. What kind of support can someone in your household provide to someone with a dementia patient in their family?

|                                                     | Never                 | Rarely                | Sometimes             | Often                 | Always                |
|-----------------------------------------------------|-----------------------|-----------------------|-----------------------|-----------------------|-----------------------|
|                                                     | (1)                   | (2)                   | (3)                   | (4)                   | (5)                   |
| Entrust the patient to run errands(1)               | <input type="radio"/> | <input type="radio"/> | <input type="radio"/> | <input type="radio"/> | <input type="radio"/> |
| Support in patient care                             | <input type="radio"/> | <input type="radio"/> | <input type="radio"/> | <input type="radio"/> | <input type="radio"/> |
| Support in household chores (3)                     | <input type="radio"/> | <input type="radio"/> | <input type="radio"/> | <input type="radio"/> | <input type="radio"/> |
| Information/advise on dementia and patient care (4) | <input type="radio"/> | <input type="radio"/> | <input type="radio"/> | <input type="radio"/> | <input type="radio"/> |
| Exchange experiences, chat (5)                      | <input type="radio"/> | <input type="radio"/> | <input type="radio"/> | <input type="radio"/> | <input type="radio"/> |

27. What would your expectations be in return for such services?

|  | Definitely do not agree | Do not agree | undecided | Agree | Definitely agree |
|--|-------------------------|--------------|-----------|-------|------------------|
|  | (1)                     | (2)          | (3)       | (4)   | (5)              |
|  |                         |              |           |       |                  |

|                                 |                       |                       |                       |                       |                       |
|---------------------------------|-----------------------|-----------------------|-----------------------|-----------------------|-----------------------|
| Nothing (1)                     | <input type="radio"/> | <input type="radio"/> | <input type="radio"/> | <input type="radio"/> | <input type="radio"/> |
| To receive similar services (2) | <input type="radio"/> | <input type="radio"/> | <input type="radio"/> | <input type="radio"/> | <input type="radio"/> |
| Monetary compensation (3)       | <input type="radio"/> | <input type="radio"/> | <input type="radio"/> | <input type="radio"/> | <input type="radio"/> |

28. Do you have any physical or mental illness diagnosed by a doctor?

- Yes (1)
- No (2)

28b. If your answer is Yes, please specify.

---

29. If you have a diagnosed physical illness, when was this diagnosis made?

- After starting to care for the patient (1)
- Before starting to care for the patient (2)

30. If you have a diagnosed mental/psychological disease, when was this diagnosis made?

- After starting to care for the patient (1)
- Before starting to care for the patient (2)

31. Do you have any medication that you constantly use for your mental / psychological problems?

- Yes (1)
- No (2)

32. If you are using medication for a mental/psychological problem, it started \_\_\_\_

- After I started caring for my patient (1)
- Before starting to care for the patient (2)

33. Do you receive any psychological help?

- Yes (1)
- No (2)
